# Supplementary material for: Syntheses, structures, topologies, and luminescence properties of four coordination polymers based on bifunctional 6-(4-pyridyl)-terephthalic acid and bis(imidazole) bridging linkers
Source: Royal Society of Chemistry journal article supplement (doi:10.1039/c4ra13501f), 2015-01-01
Supplement: c4ra13501f1.pdf [file c4ra13501f1.pdf]

*Electronic Supplementary Information (ESI) for*

**Syntheses, Structures, Topologies, and Luminescence Properties of Four Coordination Polymers**

**Based on Bifunctional 6-(4-pyridyl)-terephthalic Acid and Bis(imidazole) Bridging Linkers**

Liming Fan,<sup>a,b</sup> Weiliu Fan,<sup>a</sup> Bin Li,<sup>b</sup> Xinzheng Liu,<sup>b</sup> Xian Zhao\*<sup>a</sup> and Xiutang Zhang\*<sup>a,b</sup>

<sup>a</sup>State Key Laboratory of Crystal Materials, Shandong University, Jinan 250100, China. <sup>b</sup>Advanced Material Institute of Research, College of Chemistry and Chemical Engineering, Qilu Normal University, Jinan, 250013, China.

E-mail: xiutangzhang@163.com; zhaoxian@icm.sdu.edu.cn.

ESI

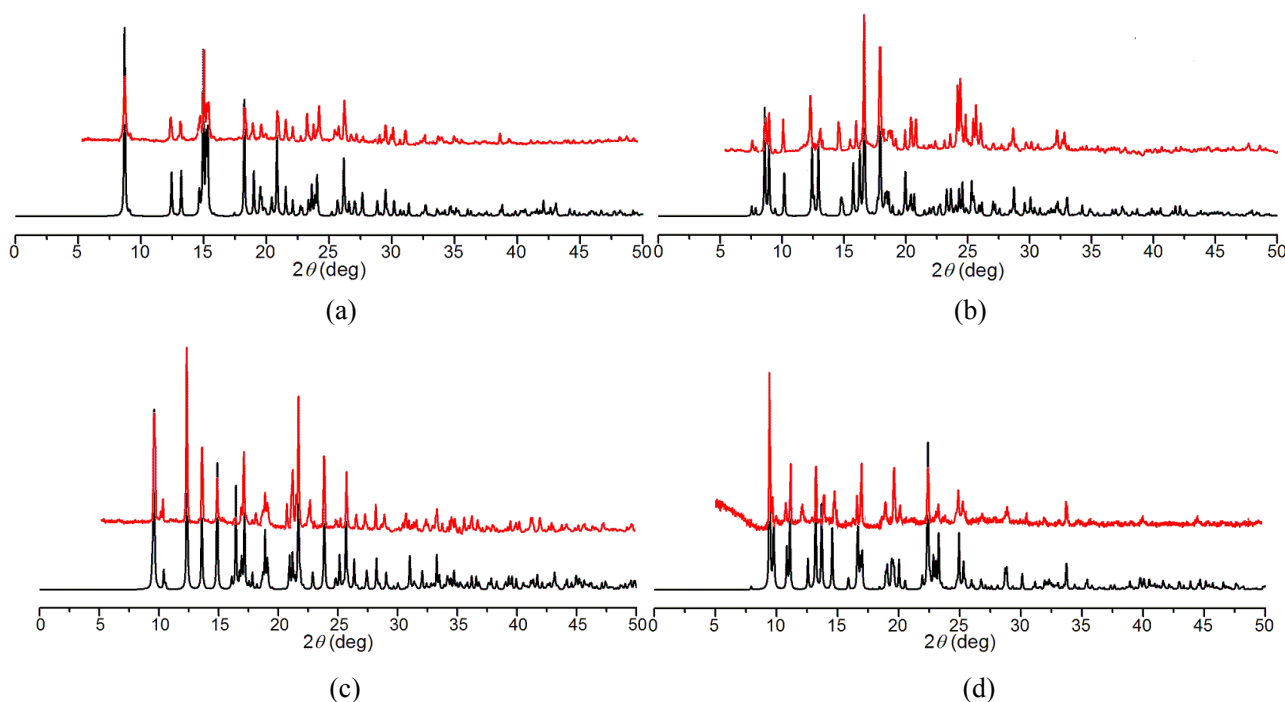

**Figure S1.** PXRD patterns of **1** (a), **2** (b), **3** (c) and **4** (d). Dark: calculated from the X-ray single-crystal data; Red: observed for the as-synthesized solids.

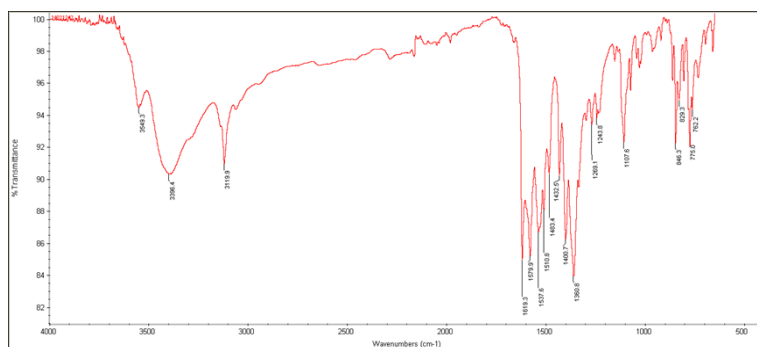

(a)

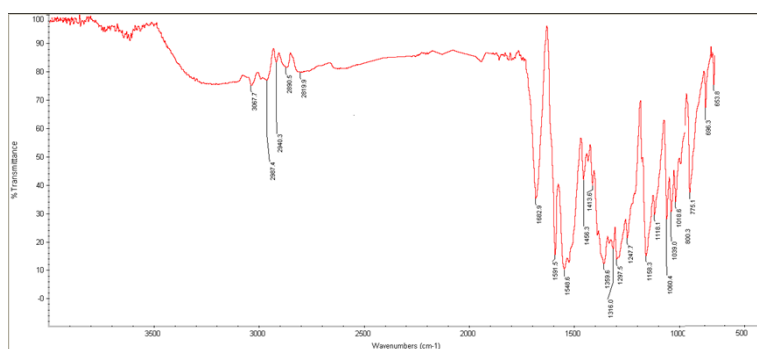

(b)

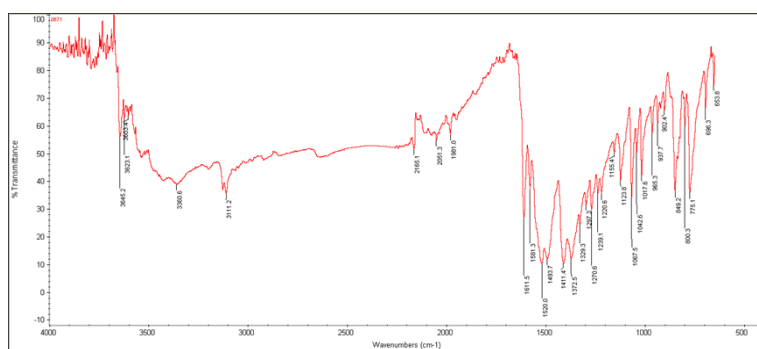

(c)

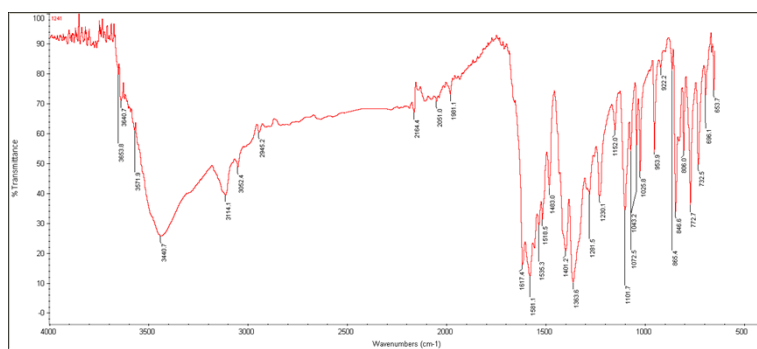

(d)

**Figure S2.** IR spectra of **1** (a), **2** (b), **3** (c), and **4** (d).

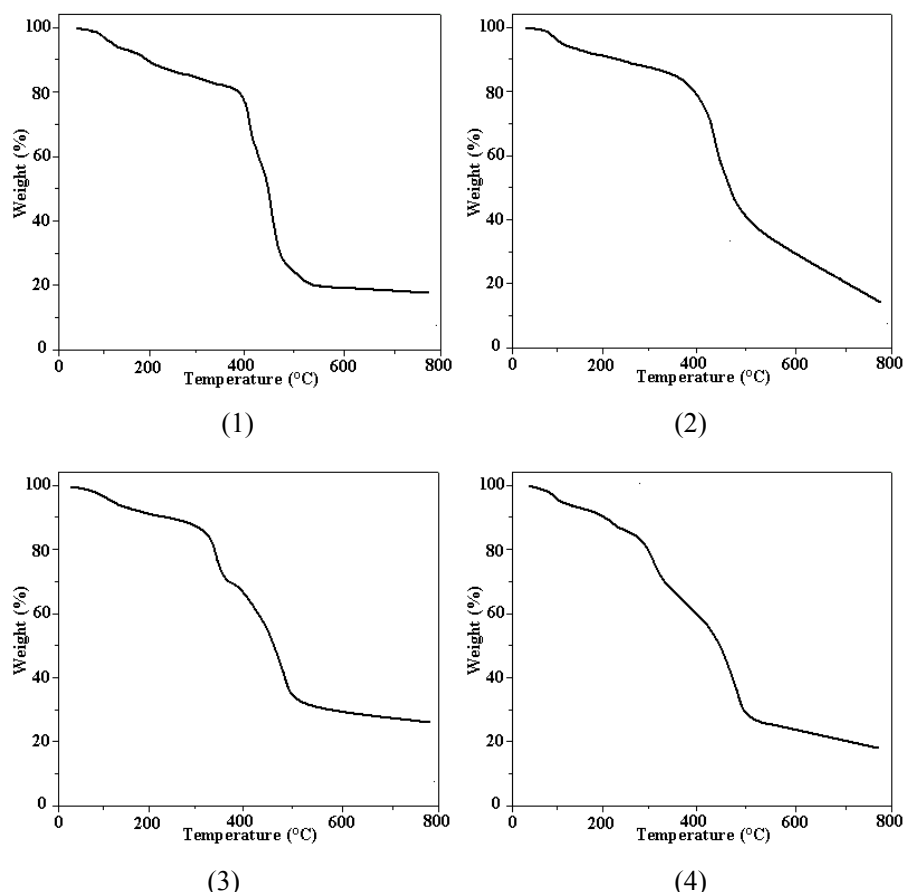

Figure S3. TG curves for 1 (a), 2 (b), 3 (c), and 4 (d).

Table S1 Selected bond lengths (Å) and angles (°) for 1 – 4.

|                                                                                          |            |                                              |            |                                              |            |                                              |            |
|------------------------------------------------------------------------------------------|------------|----------------------------------------------|------------|----------------------------------------------|------------|----------------------------------------------|------------|
| <b>Complex 1</b>                                                                         |            |                                              |            |                                              |            |                                              |            |
| Cu(1)-O(1) <sup>#2</sup>                                                                 | 2.010(2)   | Cu(1)-N(1) <sup>#4</sup>                     | 2.034(3)   | Cu(2)-N(2) <sup>#5</sup>                     | 1.961(3)   | Cu(2)-N(2)                                   | 1.961(3)   |
| Cu(1)-O(1)                                                                               | 2.010(2)   | Cu(1)-O(1W)                                  | 2.187(4)   | Cu(2)-O(4)                                   | 2.024(2)   | Cu(2)-O(4) <sup>#5</sup>                     | 2.024(2)   |
| Cu(1)-N(1) <sup>#3</sup>                                                                 | 2.034(3)   | O(1)-Cu(1)-N(1) <sup>#4</sup>                | 94.12(10)  | N(1) <sup>#3</sup> -Cu(1)-O(1W)              | 100.73(8)  | N(2) <sup>#5</sup> -Cu(2)-O(4)               | 88.27(11)  |
| O(1) <sup>#2</sup> -Cu(1)-O(1)                                                           | 178.91(13) | N(1) <sup>#3</sup> -Cu(1)-N(1) <sup>#4</sup> | 158.54(15) | N(1) <sup>#4</sup> -Cu(1)-O(1W)              | 100.73(8)  | N(2)-Cu(2)-O(4) <sup>#5</sup>                | 88.27(11)  |
| O(1) <sup>#2</sup> -Cu(1)-N(1) <sup>#3</sup>                                             | 94.12(10)  | O(1) <sup>#2</sup> -Cu(1)-O(1W)              | 90.55(7)   | N(2)-Cu(2)-N(2) <sup>#5</sup>                | 180.00(18) | N(2) <sup>#5</sup> -Cu(2)-O(4) <sup>#5</sup> | 91.73(11)  |
| O(1)-Cu(1)-N(1) <sup>#3</sup>                                                            | 85.68(10)  | O(1)-Cu(1)-O(1W)                             | 90.55(7)   | N(2)-Cu(2)-O(4)                              | 91.73(11)  | O(4)-Cu(2)-O(4) <sup>#5</sup>                | 180.00(9)  |
| O(1) <sup>#2</sup> -Cu(1)-N(1) <sup>#4</sup>                                             | 85.68(10)  |                                              |            |                                              |            |                                              |            |
| Symmetry codes: #2 -x+2, y, -z+3/2; #3 x, -y, z+1/2; #4 -x+2, -y, -z+1; #5 -x+1, -y, -z. |            |                                              |            |                                              |            |                                              |            |
| <b>Complex 2</b>                                                                         |            |                                              |            |                                              |            |                                              |            |
| Co(1)-O(1) <sup>#1</sup>                                                                 | 2.080(2)   | Co(1)-N(5) <sup>#2</sup>                     | 2.135(3)   | Co(1)-N(2)                                   | 2.158(3)   | Co(1)-N(1) <sup>#3</sup>                     | 2.202(3)   |
| Co(1)-O(4)                                                                               | 2.109(2)   | Co(1)-O(5)                                   | 2.155(2)   | O(4)-Co(1)-N(2)                              | 88.58(11)  | O(4)-Co(1)-N(1) <sup>#3</sup>                | 85.87(9)   |
| O(1) <sup>#1</sup> -Co(1)-O(4)                                                           | 173.71(11) | O(4)-Co(1)-O(5)                              | 88.57(9)   | N(5) <sup>#2</sup> -Co(1)-N(2)               | 175.73(11) | N(5) <sup>#2</sup> -Co(1)-N(1) <sup>#3</sup> | 89.07(12)  |
| O(1) <sup>#1</sup> -Co(1)-N(5) <sup>#2</sup>                                             | 98.66(11)  | N(5) <sup>#2</sup> -Co(1)-O(5)               | 89.68(11)  | O(5)-Co(1)-N(2)                              | 90.22(11)  | O(5)-Co(1)-N(1) <sup>#3</sup>                | 174.35(9)  |
| O(4)-Co(1)-N(5) <sup>#2</sup>                                                            | 87.15(11)  | O(1) <sup>#1</sup> -Co(1)-N(2)               | 85.60(11)  | O(1) <sup>#1</sup> -Co(1)-N(1) <sup>#3</sup> | 96.59(10)  | N(2)-Co(1)-N(1) <sup>#3</sup>                | 90.62(12)  |
| O(1) <sup>#1</sup> -Co(1)-O(5)                                                           | 89.05(10)  |                                              |            |                                              |            |                                              |            |
| Symmetry codes: #1 x-1/2, -y+1/2, z-1/2; #2 x-1/2, -y+1/2, z+1/2; #3 -x, y, -z+3/2.      |            |                                              |            |                                              |            |                                              |            |
| <b>Complex 3</b>                                                                         |            |                                              |            |                                              |            |                                              |            |
| Cd(1)-N(3)                                                                               | 2.243(3)   | Cd(1)-N(1) <sup>#3</sup>                     | 2.288(3)   | Cd(1)-O(1) <sup>#4</sup>                     | 2.364(3)   | Cd(1)-O(3)                                   | 2.488(3)   |
| Cd(1)-O(4)                                                                               | 2.244(3)   | Cd(1)-O(2) <sup>#4</sup>                     | 2.324(3)   | O(4)-Cd(1)-O(2) <sup>#4</sup>                | 144.24(12) | N(1) <sup>#3</sup> -Cd(1)-O(1) <sup>#4</sup> | 90.37(11)  |
| N(3)-Cd(1)-O(4)                                                                          | 107.65(13) | N(1) <sup>#3</sup> -Cd(1)-O(3)               | 147.96(11) | N(1) <sup>#3</sup> -Cd(1)-O(2) <sup>#4</sup> | 115.30(12) | O(2) <sup>#4</sup> -Cd(1)-O(1) <sup>#4</sup> | 55.13(10)  |
| N(3)-Cd(1)-N(1) <sup>#3</sup>                                                            | 98.30(12)  | O(2) <sup>#4</sup> -Cd(1)-O(3)               | 93.44(12)  | N(3)-Cd(1)-O(1) <sup>#4</sup>                | 143.27(11) | N(3)-Cd(1)-O(3)                              | 95.76(13)  |
| O(4)-Cd(1)-N(1) <sup>#3</sup>                                                            | 93.65(11)  | O(1) <sup>#4</sup> -Cd(1)-O(3)               | 95.34(12)  | O(4)-Cd(1)-O(1) <sup>#4</sup>                | 107.31(12) | O(4)-Cd(1)-O(3)                              | 54.57(11)  |
| N(3)-Cd(1)-O(2) <sup>#4</sup>                                                            | 89.31(11)  |                                              |            |                                              |            |                                              |            |
| Symmetry codes: #3 x-1/2, -y+1/2, z-1/2; #4 -x+1/2, y+1/2, -z+1/2.                       |            |                                              |            |                                              |            |                                              |            |
| <b>Complex 4</b>                                                                         |            |                                              |            |                                              |            |                                              |            |
| N(3)-Zn(1)                                                                               | 1.998(5)   | O(2)-Zn(1)                                   | 1.972(4)   | Zn(1)-O(4) <sup>#4</sup>                     | 1.980(4)   | Zn(1)-N(1) <sup>#5</sup>                     | 2.070(4)   |
| O(2)-Zn(1)-O(4) <sup>#4</sup>                                                            | 107.23(18) | O(4) <sup>#4</sup> -Zn(1)-N(3)               | 116.66(19) | O(4) <sup>#4</sup> -Zn(1)-N(1) <sup>#5</sup> | 112.19(18) | N(3)-Zn(1)-N(1) <sup>#5</sup>                | 106.99(19) |
| O(2)-Zn(1)-N(3)                                                                          | 115.54(19) | O(2)-Zn(1)-N(1) <sup>#5</sup>                | 96.49(17)  |                                              |            |                                              |            |
| Symmetry codes: #4 -x+3/2, y-1/2, -z+1/2; #5 x-1/2, -y+1/2, z-1/2.                       |            |                                              |            |                                              |            |                                              |            |
